# Supplementary material for: Comprehensive Rehabilitation Nursing Management of Bariatric Surgery: Chinese Expert Consensus
Source: Research Square preprint supplement (doi:10.21203/rs.3.rs-7033052/v1), 2025-10-12
Supplement: Supplementary file 1 [file 3fac752c708c9a7af6ec8137.docx]

Table S1. Quality of evidence

| Quality Level | Definitions |
| --- | --- |
| High | Further research is very unlikely to change our confidence in the estimate of effect |
| Moderate | Further research is likely to have an important impact on our confidence in the estimate of effect and may change the estimate |
| Low | Further research is very likely to have an important impact on our confidence in the estimate of effect and is likely to change the estimate |
| Very low | Any estimate of effect is very uncertain |
